# Supplementary material for: Proteomic analysis of a compatible interaction between sugarcane and Sporisorium scitamineum
Source: Wiley journal article supplement (doi:10.1002/pmic.201500245), 2016-02-09
Supplement: pmic12260-sup-0004-TableS1.doc [file pmic12260-sup-0004-TableS1.doc]

**Supporting Information Table S1-List of all the primers used in the study**

| **S. No.** | **Spot Ids** | **Accession** | **Primers** | **Primer sequence** | **Product size (in bp)** |
| --- | --- | --- | --- | --- | --- |
|  | A5 | PUT-177a-Saccharum_hybrid_cultivar__mixed_-4848552 | A5F | GCTTGGAGAAGCACCCTACA | 184 |
| A5R | CATGCGATCAGCTCGGAAGT |
|  | A17 | PUT-157a-Saccharum_officinarum-821133727 | A17F | ATGGCGAAGAACTACCCGAC | 186 |
| A17R | GTTCTTCATCGTGCCGAAGG |
|  | A21 | PUT-157a-Saccharum_officinarum-75341 | A21F | CTACTCGCACCACTCCAACG | 208 |
| A21R | CCTGTCGTACTCAGGGTCGTA |
|  | A29 | PUT-157a-Saccharum_officinarum-759133732 | A29F | CTGGTACTACCTCAAGGACGC | 180 |
| A29R | TCGAAGCCCGTGTAGAACTC |
|  | A34 | PUT-157a-Saccharum_officinarum-94733 | A34F | TCTCTCCAAGGTGCCGATTC | 198 |
| A34R | GATGCAATGTGGCCATCAGG |
|  | A37 | PUT-177a-Saccharum_hybrid_cultivar_SP80_3280-26484 | A37F | CCGACAAGCCCAACTACGT | 179 |
| A37R | CAGCCTGACATTCAGGTCC |
|  | A41 | PUT-177a-Saccharum_hybrid_cultivar_SP70_1143-6189 | A41F | GGCCACCATCAAGACAAAGC | 182 |
| A41R | GGTCAATGCGTGAGAACACC |
|  | A45 | PUT-177a-Saccharum_hybrid_cultivar__mixed_-17674 | A45F | CTGCAGTACGCGATTGGTTG | 186 |
| A45R | CTGAGTTGACAATGGTGGCG |
|  | A48 | PUT-157a-Saccharum_officinarum-40792 | A48F | GGCCTATTATGGCTGGGAGT | 200 |
| A48R | GGCTCCACCTCCTTGAAACT |
|  | B33 | PUT-157a-Saccharum_officinarum-750133730 | B33F | CTTCTGCGAGGTGATGAACGG | 183 |
| B33R | CTGTCCTGCTTGGGCTTGAG |
|  | - | BQ536525.1 | 25SrRNAF | GGCAGCCAAGCGTTCATAGC | 198 |
| 25SrRNAR | GGGTAAAACTAACCTGTCTCACGA |
|  | - | gi|373129891 | Ss-EF1α F | CTGGTATCTCCAAGGACGGC | 195 |
| Ss-EF1α R | GGACGAAGGCAACGGTCTTG |
| 13. | B9 | JFOL01000247 | CMUF | CTCGTCTCGGCTCGTATGCTT | 190 |
| CMUR | CCTTAGCCTTCTGTTGGACGC |
