# Supplementary material for: Proteomic analysis of a compatible interaction between sugarcane and Sporisorium scitamineum
Source: Wiley journal article supplement (doi:10.1002/pmic.201500245), 2016-02-09
Supplement: pmic12260-sup-0005-TableS2.xls [file pmic12260-sup-0005-TableS2.xls]

## Sheet: Sheet1
S.No.	Spot id	Accession	Protein description	Matched Peptide sequence
1	A1	PUT-157a-Saccharum_officinarum-8976	Putative transketolase 1	YTPESPGDATR, SIITGEFPTGWADALPK, HTPEGAALEADWNAK, NPYWFNR
2	A3	PUT-177a-Saccharum_hybrid_cultivar_SP80_3280-27081	Vacuolar ATP synthase catalytic subunit A	YSNSEAVVYVGCGER,LAEMPADSGYPAYLAAR,NIIHFNTLANQAVER,LAADTPLLTGQR,LAEMPADSGYPAYLAAR,FDPDFIDIR,FTMLQTWPVR
3	A5	PUT-177a-Saccharum_hybrid_cultivar__mixed_-4848552	Phosphoglucomutase	ALEYADFDKFDR,GWDAQVLGEAPYK,YLVSPPEIDR,YAGMLQYDGELK,GIDAQIASGGGR,VHILTDGR,YENDWDVVK,IDQLQLLLK
4	A7	PUT-177a-Saccharum_hybrid_cultivar__mixed_-1503	Disulfide isomerase	SDYDFGHTLHANHLPR,SEPIPEVNNEPVK,SVYSAAAEEFQNK,FLIGDIEASQGAFQYFGLK,YEIQGFPTLK,VVVADNIHDFVFK,GDAAVERPLVR,FIDASSTPR,VVTFDKNPDNHPYLMK,FFQSTAPK
5	A8	PUT-157a-Saccharum_officinarum-71575	Chaperonin CPN60-1, mitochondrial precursor (HSP60-1)	LLEQGNTDLGYDAAK,CELDDPLILIHDK,GYISPYFITNSK,AAVEEGIVPGGGVALLYASK,IGVQIIQNALK,LQTANFDQK
6	A9	PUT-157a-Saccharum_officinarum-694133734	Importin alpha-1b subunit.	NATWTLSNFCR, SPPIEEVISTGVVPR, GKPQPNFDQVKPALPALQR,AAVEEGIVVGGGCTLLR, SSENFLYVVEGMQFDR
7	A10	PUT-181a-Saccharum_hybrid_cultivar_CoS_767-976	Vacuolar ATP synthase subunit B isoform 1;	QIYPPINVLPSLSR,VTLFLNLANDPTIER,FVTQGAYDTR,KFVTQGAYDTR,YQEIVNIR,TPVSLNMLGR
8	A11	PUT-157a-Saccharum_officinarum-1061133731	UDP-glucose dehydrogenase	AADLTYWESAAR,DVYAHWVPEDR,FLNASVGFGGSCFQK,ILTTNLWSAELSK,LAANAFLAQR,NLFFSTDVEK
9	A13	PUT-177a-Saccharum_hybrid_cultivar__mixed_-1748549	Fructokinase-1	TQILSIWDQADIVK,VQQVDTTGAGDAFVGALLR,DFHGAVPSFK,EAGALLSYDPNLR,AAVFHYGSISLIAEPCR
10	A14	PUT-157a-Saccharum_officinarum-723133734	Putative ripening regulated protein DDTFR18 (Glycine rich RNA binding protein)	VDTIDTTGAGDAFVGSLLVNVAK,QNNVNSEGCLFDQHAR,IFHYGSISLIADPVR,AAGILCSYDPNVR,NPSADMLLTEAELNLDLIR,LPLWPSPDAAR,QNNVNSEGCLFDQHAR
11	A17	PUT-157a-Saccharum_officinarum-821133727	L-ascorbate peroxidase 1, cytosolic	ALLSDPAFRPLVEK, SGFEGAWTTNPLVFDNSYFK, LAWHSAGTFDVSTR, QMGLSDQDIVALSGGHTLGR
12	A18	PUT-177a-Saccharum_hybrid_cultivar_SP70_1143-1119017	Methionine synthase (5-methyltetrahydropteroyltriglutamate-homocysteine methyltransferase)	LQEELDIDVLVHGEPER,DEAYFAANAAAQASR,ELNLPVLPTTTIGSFPQTVELR,ALAGQKDEAYFAANAAAQASR,YLFAGVVDGR,SWLAFAAQK,TLTSLSGVTAYGFDLVR,VIQIDEAALR
13	A19	PUT-177a-Saccharum_hybrid_cultivar_SP80_3280-42312	Similar to Heat shock protein 70	NINPDEAVAYGAAVQAAILSGEGNEK,NAVVTVPAYFNDSQR,IINEPTAAAIAYGLDK,TTPSYVAFTDSER,EIAEAYLGSTIK,FEELNMDLFR
14	A20	PUT-157a-Saccharum_officinarum-274133733	DnaK-type molecular chaperone Heat shock protein 70	NAVVTVPAYFNDSQR,IINEPTAAAIAYGLDK,SSVHDVVLVGGSTR,TTPSYVAFTDSER,EIAEAYLGSTIK,FEELNMDLFR,DAGVIAGLNVLR
15	A21	PUT-157a-Saccharum_officinarum-75341	Polyphenol oxidase	KGPESFLGEK, VTINVRPTIK, DLGYTYDPEYDR, EYAGSFAVVPGSGAGETR, NLCTIYNQQVR
16	A22	PUT-157a-Saccharum_officinarum-61166	Mitochondrial processing peptidase beta subunit.	YASPVPSHADHTAILAAPETR,EDLENYIATHYTAPR,TATVGVWIDAGSR,AMEVLADILQNSNLDQK,SAAQLEQEIEDMGGHLNAYTSR,APVMPYDR
17	A25	PUT-157a-Saccharum_officinarum-102133729	S-adenosylmethionine synthetase 1	NIGFVSADVGLDADHCK,IIIDTYGGWGAHGGGAFSGK,VLVNIEQQSPDIAQGVHGHFTK,VHTVLISTQHDETVTNDEIAADLK,DDPDFTWEVVKPLK,FVIGGPHGDAGLTGR,EHVIKPVIPEQYLDEK,TAAYGHFGR,TIFHLNPSGR,NGTCPWLRPDGK
18	A26	PUT-181a-Saccharum_hybrid_cultivar_CoS_767-1940	Succinyl-CoA ligase beta subunit	LNFDDNAAFR,LNIHEYQGAELMGK,CDCTLLEINPLAETADNK,LHGGTPANFLDVGGSASEGQVVEAFK,LYELFCK
19	A27	PUT-177a-Saccharum_hybrid_cultivar_SP80_3280-9382243	Glutamine synthetase	HETADINTFSWGVANR,HKEHIAAYGEGNER,IFSNPEVAAEEPWYGIEQEYTLLQK,EHIAAYGEGNER,WNYDGSSTGQAPGEDSEVILYPQAIFK,IIAEYIWIGGSGMDLR
20	A28	PUT-157a-Saccharum_officinarum-62402	Adenosine kinase-like protein	SNVEYIAGGATQNSIR,NAQAAGVTAHYYEDETTPTGTCAVCVVGGER,VLPYADYIFGNETEAK,SLIANLSAANCYK,AGCYAANVIIQR,GWETENIEEIALK,AGCYAANVIIQRPGCTYPEKPDFN,VRGWETENIEEIALK,TFPVILLPK
21	A29	PUT-157a-Saccharum_officinarum-759133732	Caffeic acid 3-O-methyltransferase	NALELGLLEVLQAEAPAGK,LPVAPTNPDAADMVDR,VIVVECVLPVNTEAVPK,DAVLDGGIPFNK,ALAPEEVVAR,AQGVFHVDMIMLAHNPGGR,AYGMTAFEYHGTDPR
22	A31	PUT-157a-Saccharum_officinarum-82151	Isoflavone reductase homolog IRL	GDLYDQSSLVSAVK,GADVVISTVGSMEIADQTR,FFPSEFGLDVDR,ILVVGGTGYLGR,LGHPTVALVR,GADVVISTVGSMEIADQTR,SFQDAGVTLLK
23	A32	PUT-157a-Saccharum_officinarum-10253	Putative NADPH-thioredoxin reductase	VVWDSEVVEAYGGADGGPLAGVK,YGSHVYIIHR,VCIIGSGPAAHTAAIYAAR,GISACAVCDGAAPIFR,FGTNILSETVTAVDFSASPFR,LHFPGSDAYWNR,FLGGQLELDSDGYVATEPGSTHTSVK
24	A33	PUT-157a-Saccharum_officinarum-24479	Glutathione S-transferase I	CATALEEAGSDYEIVPINFATAEHK,NPFGQVPALQDGDLYLFESR,LYGAVLSWNVTR,VLEVYEAR,AWWSSLMER,LYGAVFSWNVTR
25	A34	PUT-157a-Saccharum_officinarum-94733	6-phosphogluconolactonase	VPIPPGQVYAINDALSAEGAADDYEACLK,KLTEPPYLDSVDWSK,LTEPPYLDSVDWSK,GAFTAVLSGGSLIEALR,WHVFWVDER,LAFDGFLSK
26	A37	PUT-177a-Saccharum_hybrid_cultivar_SP80_3280-26484	Caffeoyl-CoA O-methyltransferase 1	YVLDTSVLPHEPDCMR,VEVCQLAIADGITICR,EYYDIGRPFIDK,YVLDTSVLPHEPDCMR,HEWGFMQSSPDEAQLLR,YHEQLLR,LVTDKHEWGFMQSSPDEAQLLR
27	A38	PUT-181a-Saccharum_hybrid_cultivar_CoS_767-6811	Salt Tolerance protein	NPNPVPIPLVDIDYLIDSDGR,LVSGLIPDAGTIHAHGQETVK,IPVSLVFDDIK,PTADVSGIHIPHISLHR,DGEIPVPYKPDVDVEK,VVLLVDVPIIGR,DIQPGSIIPYLVR,DFGSAVWDMIR,MQVPFSFRPK
28	A39	PUT-157a-Saccharum_officinarum-114327	Legumin-like protein	AEGGVLFIVPR,VVVLNTANLPLVK,DVGLGADLVR,RLDSEIFFAPPSSN,AISAEVLQASFNTTPEMEQLFR
29	A41	PUT-177a-Saccharum_hybrid_cultivar_SP70_1143-6189	Alpha tubulin	EDAANNFAR, YMACCLMYR, QLFHPEQLISGK, LVSQVISSLTASLR, SLDIERPTYTNLNR, AVFVDLEPTVIDEVR, CGINYQPPSVVPGGDLAK
30	A45	PUT-177a-Saccharum_hybrid_cultivar__mixed_-17674	Triosephosphate isomerase	HIIGEDDEFIGK,APDFATIVNSVTAK,KEDIDGFLVGGASLK,VATPEQAQEVHAAVR,IIYGGSVNAANCAELAK,IEVSAQNVWIGK,LIACIGELLEER,FFVGGNWK,TNVSPEVASSTR,AAYALSQNVK
31	A46	PUT-181a-Saccharum_hybrid_cultivar_CoS_767-2311317	Enolase 1	AAVPSGASTGVYEALELR,TYDLNFKEENNDGSQK,GNPTVEVDVCCSDGTFAR,YGQDATNVGDEGGFAPNIQENK,MTEEIGDQVQIVGDDLLVTNPTR,VNQIGSVTESIEAVK,HAGWGVMTSHR
32	A48	PUT-157a-Saccharum_officinarum-40792	Auxin amidohydrolase	IHENPELGYEEFQTSELVR,ELDALGIPYR,AEGPAAALQDPAELLR
33	B11	PUT-157a-Saccharum_officinarum-141133727	Putative bark storage protein	HGDGPENELPLEGAGDYTR,SPSFKPSDDNPFLDVQGR,GCSANIYTDNASYR,QHAFWVPVSK
34	B12	PUT-177a-Saccharum_hybrid_cultivar_SP80_3280-33637	Malate dehydrogenase	IVQGLPIDEFSR,ELVADDEWLNGEFITTVQQR,NVIIWGNHSSTQYPDVNHATVK,VLVTGAAGQIGYALVPMIAR
35	B14	PUT-177a-Saccharum_hybrid_cultivar_SP80_3280-27997	Cinnamyl alcohol dehydrogenase	DATGHLAPYTYTLR,VLYCGICHTDIHQAK,IPAGLAPEQAAPLLCAGVTVYSPLK,YGVGDVVGVGVIVGCCR
36	B15	PUT-157a-Saccharum_officinarum-98910	Quinone-oxidoreductase	VYVVYYSTYGHVGK,IWQVPETLPEEVLGK,WPSEVELEHAFHQGK,AFFDATGGLWR,MGAPPKPDVPVITPQELAEADGILFGFPTR,LFGMDQVQGGSPYGAGTFAADGSR
37	B16	PUT-157a-Saccharum_officinarum-65561	1,4-benzoquinone reductase	IWQVPEILSEEVLGK,VYVVFYSTYGHVAK,WPTEVELEHAFHQGK,TDAPIITPQELAEADGILFGFPTR,IFDMESVHGGSPYGAGTFAGDGSR,AFFDATGGLWR
38	B17	PUT-157a-Saccharum_officinarum-104910	Beta 2 subunit of 20S proteasome	EEGIELVSDAIR,NHQLPNPR,AGIFNDLGSGSNVDVCVITK,TTIVGLVFQDGVVLGADTR
39	B19	PUT-157a-Saccharum_officinarum-59304	Proteasome subunit beta type 3	LGVQLQTIATDFQR,LYIGLSGLATDAQTLYQR,NCFAIASDR,DCLSGWGGYVLIVTPTEVR,RLGVQLQTIATDFQR
40	B21	PUT-157a-Saccharum_officinarum-95710	Putative 26S proteasome regulatory subunit	EVQNPIHLTVDTGFTR,VEAVVLFNVCDSYVR,IQDNLALVYLSSITR,HLAAQFQEIPLDLR
41	B27	PUT-157a-Saccharum_officinarum-24430	Proteasome subunit beta type 1	GCVFTYDAVGSYER,DAVTPLSESEAIDLVK,ELLYQHQHNK,ELLYQHQHNKR,CVLASSGFQGDIK,DVFASATER,LSVGYSILTR,TGYSAQGTGSTLIMPVLDNQLK,SPSPLLLPAR
42	B28	PUT-157a-Saccharum_officinarum-69505	UDP-glucose pyrophosphorylase	YSNSNIEIHTFNQSQYPR,VQLLEIAQVPDEHVNEFK,YLSGEAEQIEWSK,ANPANPSIELGPEFK,VLQLETAAGAAIR,IVTEDFLPLPSK,GGTLISYEGR,AGFISLVSR
43	B30	PUT-157a-Saccharum_officinarum-122366	Hypothetical protein	LCQVIHDTPLSCVIGSR,WVGLATDFSEGSR,VLLGSVSDYVVNNATCPVTVVK,YGAKPDIETLDILNTTATQK,AGDHLLLLHVIK,KYGAKPDIETLDILNTTATQK,WAAANLLR
44	B31	PUT-157a-Saccharum_officinarum-125951	Superoxide dismutase [Cu-Zn]	HAGDLGNVTAGADGVANISVTDSQIPLTGPNSIIGR,AVVVHADPDDLGK,EHGAPEDENR,AVAVLGSSEGVK,ALGDTTNGCISTGPHYNPASK,GTIFFTQEGDGPTTVTGSVSGLK,VACGIIGLQG
45	B32	PUT-157a-Saccharum_officinarum-95981	Hypothetical CBS domain containing protein	LEDSGFETATVSDVLK,SMTQHNVGALVVVKPGEDK,VLQAMQLMTDNR,SADGSWLWCTTEDTVYDAVK,HIPVIDGTGMLGMVSIGDVVR
46	B33	PUT-157a-Saccharum_officinarum-750133730	Phenylalanine ammonia-lyase	EVNSVNDNPVIDVHR,TSPQWLGPQIEVIR,HLNAGIFGTGSDGHTLPSEVVR,DGPALQVELLR,INTLLQGYSGIR,ALHGGNFQGTPIGVSMDNAR,IAGIEGGFFK,LLNTGVSPCLPLR
47	C1	PUT-157a-Saccharum_officinarum-953133729	Proteasome regulatory particle triple-A ATPase subunit3	FDAQTGADR, KIEFPLPDR, GVLLYGPPGTGK, AVAHHTTAAFIR,ADTLDPALLRPGR , ELLKPSASVALHR, EAVELPLTHHELYK, ISAADIAAICQEAGMHAVR
48	C2	PUT-157a-Saccharum_officinarum-65546	Alpha-1,4-glucan-protein synthase [UDP-forming]	TGLPYIWHSK, VPEGFDYELYNR, DLIGPAMYFGLMGDGQPIGR, NIMSPSTPFFFNTLYDPYR, ASNPFVNLR, YIYTIDDDCFVAK
49	C3	PUT-177a-Saccharum_hybrid_cultivar_SP80_3280-464	Putative uncharacterized protein	TYGLGPYSTSIK, KVEFGLPDLEGR, FDDGVGGDNEVQR, NPRPLDEDDIALLK, ACIVFFDEVDAIGGAR
50	C5	PUT-157a-Saccharum_officinarum-49559	Nonspecific lipid-transfer protein 2	LVPVGYGIK, KLDEYLLTR, WFSHIDALLR, SVQMEGLLWGASK, DDLAVYSSFSAAPSSK, SSVLLDVKPWDDETDMAK, SYITGYQASK, LSGVTAEGLGVK
51	C8	PUT-181a-Saccharum_hybrid_cultivar_CoS_767-811318	Putative uncharacterized protein	FGSYWIK, GYLFPQNAAR, EAVAPYERPALSK, LPGFYVCVGSGGER, LTDFGTPGADFNNILYLR, AEYDESGPSIVHR, SYELPDGQVITIGAER, VAPEEHPVLLTEAPLNPK, AGFAGDDAPR
52	C9	PUT-177a-Saccharum_hybrid_cultivar__mixed_-14322	Putative uncharacterized protein	WGVQMGHSVLPK, HIDCAQAYNNEK, VPPAVDQVECHPVWQQGK, LWNTNHAPEDVPVALDGTLK, GAGFGPQSVVPSDIPATWAAMEK, AGFFVDPEGVFK, WGVQMGHSVLPK, AGAVLEHPVVVSAAEK
53	C10	PUT-157a-Saccharum_officinarum-83681	Putatuve aldo keto reductase	AGFFVDPEGVFK, WGVQMGHSVLPK, AGAVLEHPVVVSAAEK, ANIDVYDWSIPEDLLAK, VPPAVDQVECHPVWQQGK, HIDCAQAYNNEK, LWNTNHAPEDVPVALDGTLK, GAGFGPQSVVPSDIPATWAAMEK
54	B9	g5968	Secreted chorismate mutase	YESPIVHAFLAR,LSNNAVLDHGEVGKDDFPTGR,VTDALTDHQQEVR,TYPNAVWFVTPVR,NEEFCNILTSNADSATIEQK
		Spot ids correspond to spots indicated in representative 2D gel profile in Figure 1 (A-Differentially abundant, B-Induced/Unique, C-Repressed)
